# Supplementary material for: Fabrication of functional polypyrrole (PolyPyr)-nanotubes using anodized aluminium oxide (AAO) template membranes. Compromising between effectiveness and mildness of template dissolution conditions for a safe release of PolyPyr-nanotubes
Source: Royal Society of Chemistry journal article supplement (doi:10.1039/b9py00206e), 2009-12-11
Supplement: b9py00206e.pdf [file b9py00206e.pdf]

## Electronic Supplementary Information

### Fabrication of Functional Polypyrrole (PolyPyr)-Nanotubes Using Anodized Aluminium Oxide (AAO) Template Membranes. Compromising between Effectiveness and Mildness of Template Dissolution Conditions for a Safe Release of PolyPyr-Nanostructures

Natasha Esman<sup>a</sup> and Jean-Paul Lellouche\*<sup>a</sup>

<sup>a</sup> Bar-Ilan University, Department of Chemistry, Nanomaterials Research Center, Institute of Nanotechnology & Advanced Materials, Ramat-Gan 52900, Israel. Tel: 972-3-531 8324; Fax: 972-3-738 4053; E-mail: [lellouj@mail.biu.ac.il](mailto:lellouj@mail.biu.ac.il)

#### 1. Fabrication of polyCOOH polyPyr-nanotubes using nanoporous AAO membranes as hard templates (SEM/TEM analyses)

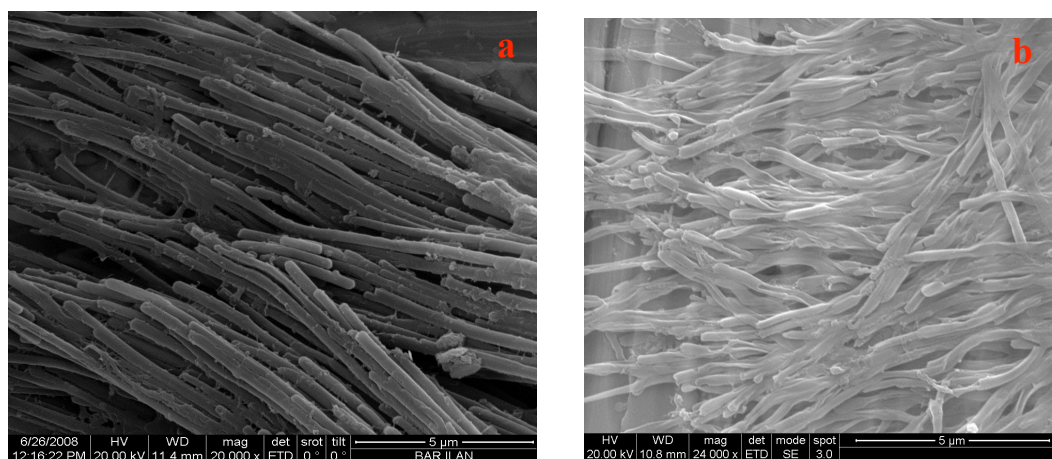

**Figure ESI-1.** SEM microphotographs of poly(2) nanotubes obtained by *acidic* digestion of AAO membranes: (a) & (b) 100 & 200 nm-sized pores respectively

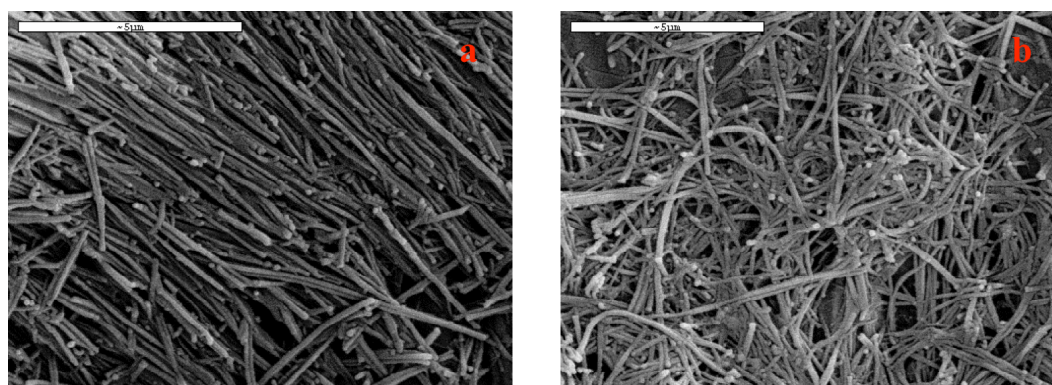

**Figure ESI-2.** SEM microphotographs of poly(3) nanotubes obtained by *acidic* digestion of AAO membranes: (a) & (b) 100 & 200 nm-sized pores respectively

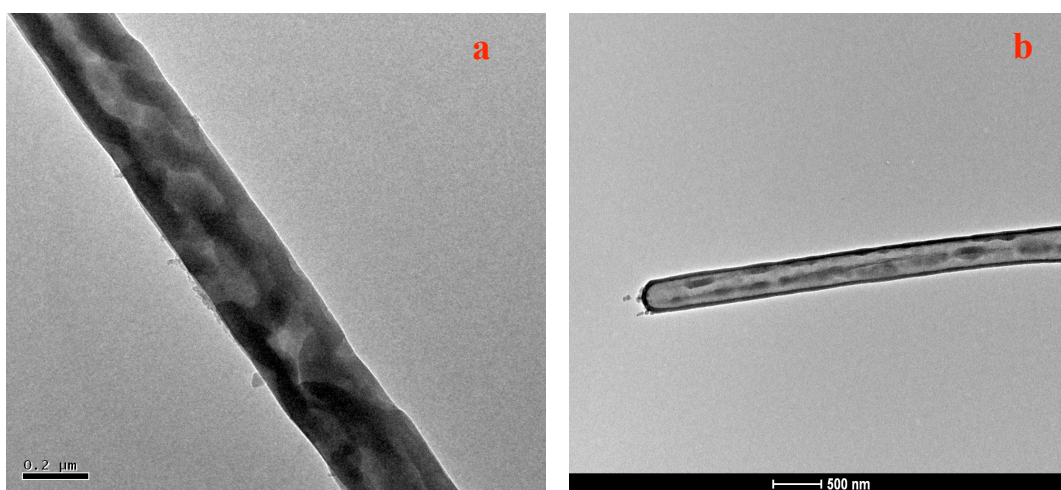

**Figure ESI-3.** TEM microphotographs of poly(2) and poly(3) nanotubes obtained by *acidic* digestion of AAO membranes (200 nm-sized pore diameter, **a** & **b** respectively)

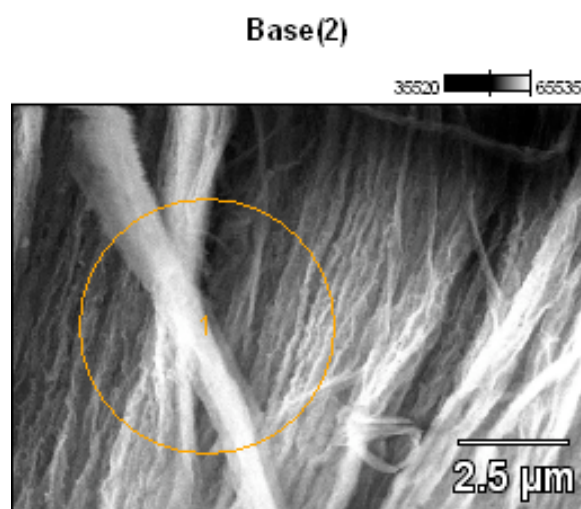

|                    | <i>C</i> | <i>N</i> | <i>O</i> | <i>Al</i> | <i>Cl</i> | <i>Cu</i> | <i>Zn</i> |
|--------------------|----------|----------|----------|-----------|-----------|-----------|-----------|
| <i>Base(2)_pt1</i> | 70.66    | 18.45    | 9.88     | 0.19      | 0.31      | 0.13      | 0.39      |

**Figure ESI-4.** HR-SEM microphotograph of poly(DPL 1) nanotubes (100 nm-sized pores of AAO membrane, *acidic* template dissolution) with atomic compositional EDS analysis showing the absence of the Fe element due to *acidic* digestion conditions

## 2. Morphological features of poly(2-3) nanotubes (acidic digestion conditions of AAO templating membranes, 50 counted objects for averaged measurements using an Image J software)

| Nanotube | Pore size (nm) | Length (nm) | Diameter (nm) | Aspect ratio | Wall thickness (nm) |
|----------|----------------|-------------|---------------|--------------|---------------------|
| Poly(2)  | 100            | 11.8        | 270.7         | 43.4         | 26.8                |
| “        | 200            | 15.8        | 335.1         | 47.2         | 68.5                |
| Poly(3)  | 100            | 11.7        | 272.3         | 42.9         | 29.5                |
| “        | 200            | 7.8         | 252.3         | 30.8         | 34.6                |

Table data relate to poly(2-3) nanotubes obtained using the same LPP protocol (p. 2 of the manuscript). Both diameter and wall thickness differences for poly(2)/poly(3)-nanotubes obtained for 100 nm-sized AAO templates are minimal, i.e. 270.7 versus 272.3 nm and 26.8 versus 29.5 nm respectively. This is no longer the case for 200 nm-sized AAO templates. Significant diameter and wall thickness differences are observed, i.e. 335.1 versus 252.3 and 68.5 versus 34.6 nm. This intriguing phenomenon may arise from a better dynamic availability of less sterically demanding monomer 2 versus monomer 3 during *intra-pore* LPP oxidations/polymerizations. Nevertheless and for both types of templates, aspect ratio values are around twice higher than the ones observed for same nanostructures released during *basic* AAO template digestions.

## 3. Illustrative FT-IR spectroscopy of polyPyr-nanotubes

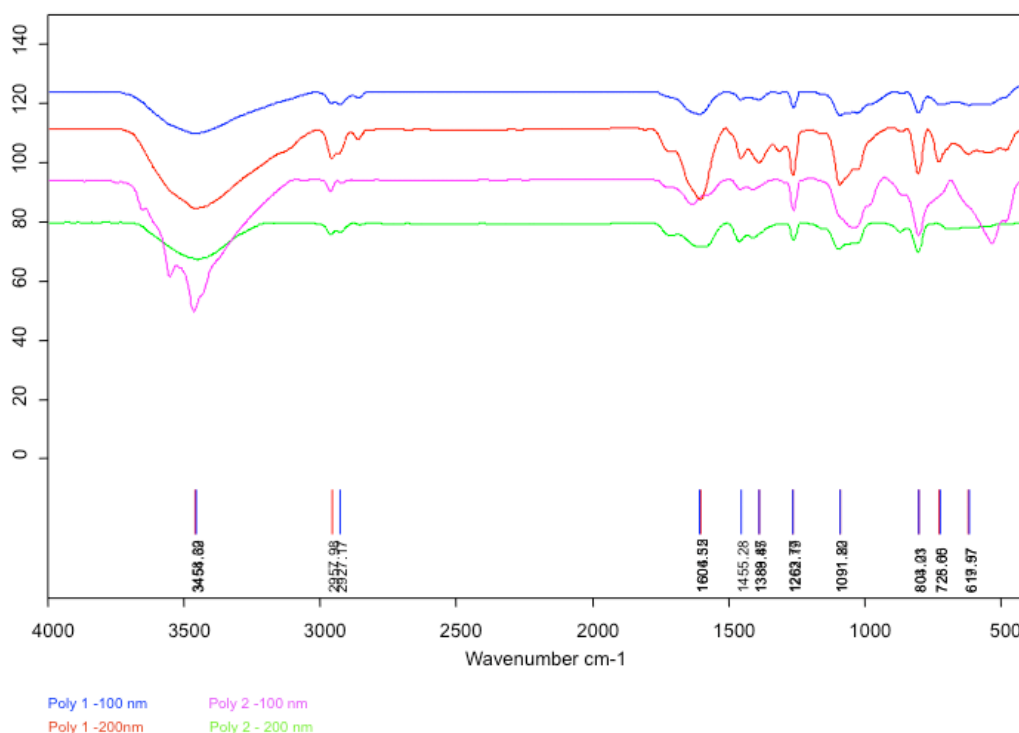

**Figure ESI-5.** FT-IR spectra of polyCOOH poly(1-2) polyPyr-nanotubes (acidic digestion for both 100 & 200 nm-sized pores of AAO templating membranes)
